# Supplementary material for: Measuring Alpha and Beta Diversity by Field and Remote-Sensing Data: A Challenge for Coastal Dunes Biodiversity Monitoring
Source: MDPI journal article supplement (doi:10.3390/rs13101928), 2021-05-15
Supplement: s1 [file s1]

# Measuring alpha and beta diversity by field and remote sensing data: A challenge for coastal dunes biodiversity monitoring

Flavio Marzioletti <sup>1,\*</sup>, Silvia Cascone <sup>2</sup>, Ludovico Frate <sup>1</sup>, Mirko Di Febbraro <sup>1</sup>, Alicia Teresa Rosario Acosta <sup>2</sup> and Maria Laura Carranza <sup>1</sup>

<sup>1</sup> Envix-Lab, Departement of Biosciences and Territory, Molise University, Contrada Fonte Lappone, 86090 Pesche (Is); flavio.marzioletti@unimol.it (F. M.); frateludovico@gmail.com (L. F.); mirko.difebbraro@unimol.it (M. D. F.); carranza@unimol.it (M. L. C.)

<sup>2</sup> Department of Sciences, Roma Tre University, Viale G. Marconi 446, 00146 Rome, Italy; silvia.cascone@uniroma3.it (S. C.); aliciateresarosario.acosta@uniroma3.it (A. T. R. A.)

\* Correspondence: flavio.marzioletti@unimol.it; Tel.: +39 3291543594

**Table S1.** PlanetScope images selected accounting of the geographic and temporal distribution of field collected vegetation plots. For each image we reported: the satellite, the date and the hour of acquisition, the product level, the cloud percentage, the zenith angle of acquisition, the coordinate of the center of each multispectral image, the name of cities and geographic area covered and the administrative Province in brackets (RM: Rome; LT: Latina; VT: Viterbo).

| Satellite | Date       | Hour  | Level | Cloud (%) | Zenith angle | Coordinate of center           | Cities and geographic area          |
|-----------|------------|-------|-------|-----------|--------------|--------------------------------|-------------------------------------|
| 0e2f      | 27/05/2017 | 09.19 | 3B    | 0         | 3.785        | 12.1936675271<br>41.9379571084 | Passoscuro – Fiumicino, (RM)        |
| 102d      | 31/05/2017 | 09.07 | 3B    | 1         | 9.172        | 13.3541468572<br>41.2546364732 | Terracina – Sperlonga (LT)          |
| 1001      | 02/05/2017 | 09.10 | 3B    | 1         | 7.728        | 12.4889034354<br>41.5776757004 | Tor San Lorenzo – Ardea (RM)        |
| 1001      | 02/05/2017 | 09.10 | 3B    | 1         | 7.854        | 12.469110219<br>41.5104592855  | Tor San Lorenzo – Ardea (RM)        |
| 1033      | 20/05/2018 | 09.25 | 3B    | 0         | 1.751        | 12.6713729304<br>41.5264322048 | Tor San Lorenzo – Ardea (RM)        |
| 1024      | 26/05/2018 | 09.30 | 3B    | 0         | 1.274        | 11.5377771274<br>42.3621860846 | Montalto di Castro – Tarquinia (VT) |
| 1024      | 26/05/2018 | 09.30 | 3B    | 0         | 1.385        | 11.5180971353<br>42.2968474549 | Montalto di Castro – Tarquinia (VT) |
| 1035      | 04/05/2020 | 09.41 | 3B    | 0         | 4.390        | 12.431300301<br>41.6706456578  | Castel Porziano – Torvaianica (RM)  |
| 1025      | 22/05/2020 | 09.37 | 3B    | 0         | 2.147        | 12.6736592396<br>41.4095091625 | Astura – Nettuno (LT)               |
| 1040      | 31/05/2020 | 09.40 | 3B    | 5         | 5.516        | 13.0277337974<br>41.3654442532 | San Felice Circeo – Sabaudia (LT)   |
| 1040      | 31/05/2020 | 09.40 | 3B    | 5         | 5.503        | 13.0085585357<br>41.3000635355 | San Felice Circeo – Sabaudia (LT)   |
| 1040      | 31/05/2020 | 09.40 | 3B    | 0         | 5.504        | 12.9888313645<br>41.234645998  | San Felice Circeo – Sabaudia (LT)   |

**Table S2.** Results of permutation marginal regressions, indicating the significance of estimates in all three linear regression (Species Richness – Distance to Centroid, Shannon Index – Distance to centroid, Simpson Index – Distance to Centroid) after 5000 permutations. P-value: \* < 0.05; \*\* < 0.01; \*\*\* < 0.001.

| <b>Species Richness – Distance to centroid</b>      | <b>p-value after 5000 permutations</b> |
|-----------------------------------------------------|----------------------------------------|
| Distance to centroid: Shifting dunes                | 0.0001***                              |
| Distance to centroid: Transition dunes              | 0.0001***                              |
| Distance to centroid: Invaded dunes                 | 0.0001***                              |
| <b>Shannon Index – Distance to centroid</b>         | <b>p-value after 5000 permutations</b> |
| Distance to centroid: Shifting dunes                | 0.0212*                                |
| Distance to centroid: Transition dunes              | 0.0006***                              |
| Distance to centroid: Invaded dunes                 | 0.0010**                               |
| <b>Inverse Simpson Index – Distance to centroid</b> | <b>p-value after 5000 permutations</b> |
| Distance to centroid: Shifting dunes                | 0.0086**                               |
| Distance to centroid: Transition dunes              | 0.0004***                              |
| Distance to centroid: Invaded dunes                 | 0.0004***                              |

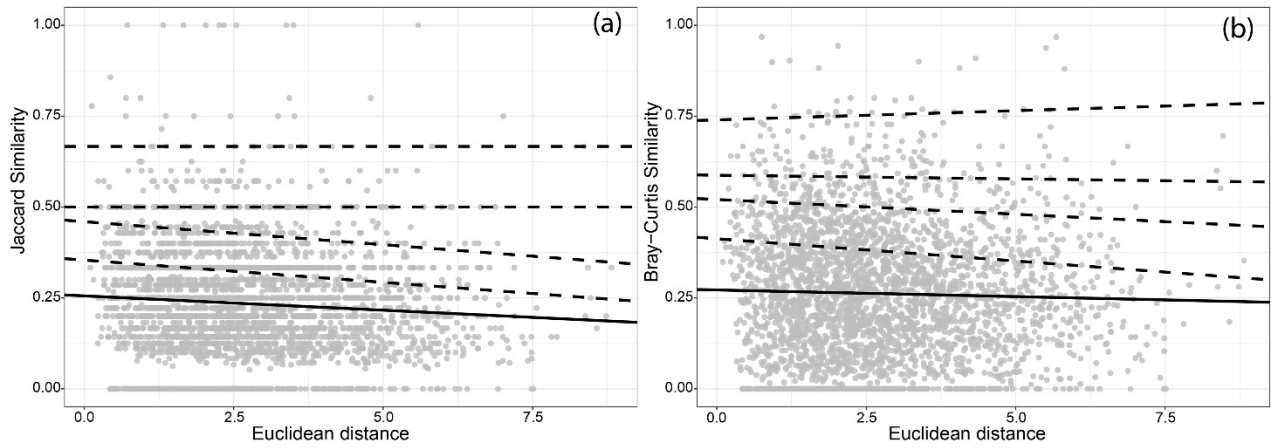

**Figure S1.** Distance Decay Models of species similarity, Jaccard (a) and Bray-Curtis (b), versus spectral distance (spectral pairwise Euclidean distance) considering Shifting dunes (N14 EUNIS category). The linear regression is described by solid line, the quantile regressions considering four different  $\tau$  (from upper to lower lines: 0.99, 0.95, 0.90, 0.75) are reported by dashed lines. Gray dots represent the sampling plots.

**Table S3.** Results of Distance Decay Models calculated by linear regression model and quantile regression at four different  $\tau$  values (from upper to lower lines: 0.99, 0.95, 0.9, 0.75), considering the vegetation plots and the pixels of Shifting dunes (N14 EUNIS category). P-value: \* < 0.05; \*\* < 0.01; \*\*\* < 0.001.

| Jaccard similarities – Euclidean distance     |        |           |                            |                          |                                           |
|-----------------------------------------------|--------|-----------|----------------------------|--------------------------|-------------------------------------------|
| Regression type                               | $\tau$ | Intercept | Intercept boundaries (99%) | decay rate               | decay rate boundaries (99%)               |
| Linear regression                             | –      | 0.256***  | 0.238 – 0.275              | -0.049***                | -0.084 – -0.013                           |
| Quantile                                      | 0.75   | 0.353***  | 0.333 – 0.371              | -0.073***                | -0.106 – 0.000                            |
|                                               | 0.90   | 0.463***  | 0.435 – 0.505              | -0.082***                | -0.160 – -0.033                           |
|                                               | 0.95   | 0.500***  | 0.500 – 0.568              | 0.000                    | -0.156 – 0.000                            |
|                                               | 0.99   | 0.667***  | 0.631 – 0.854              | 0.000                    | -0.262 – 0.123                            |
| Bray-Curtis similarities – Euclidean Distance |        |           |                            |                          |                                           |
| Regression type                               | $\tau$ | Intercept | Intercept boundaries (99%) | decay rate ( $10^{-2}$ ) | decay rate ( $10^{-2}$ ) boundaries (99%) |
| Linear regression                             | –      | 0.272***  | 0.250 – 0.295              | -0.365                   | -1.081 – 0.351                            |
| Quantile                                      | 0.75   | 0.413***  | 0.386 – 0.440              | -1.222***                | -1.963 – -0.379                           |
|                                               | 0.90   | 0.521***  | 0.484 – 0.564              | -0.810                   | -2.245 – 0.481                            |
|                                               | 0.95   | 0.587***  | 0.555 – 0.648              | -0.201                   | -2.048 – 1.047                            |
|                                               | 0.99   | 0.740***  | 0.688 – 0.796              | 0.505                    | -1.202 – 4.509                            |

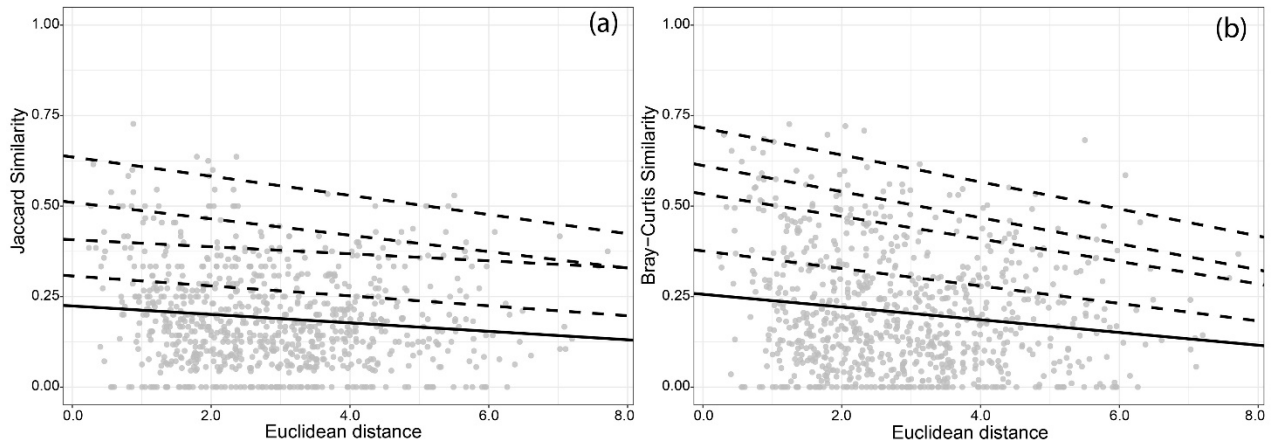

**Figure S2.** Distance Decay Models of species similarity, Jaccard (a) and Bray-Curtis (b), versus spectral distance (spectral pairwise Euclidean distance) considering the vegetation plots and the pixels of Transition dunes (N16 EUNIS category). The linear regression is described by solid line, the quantile regressions considering four different  $\tau$  (from upper to lower lines: 0.99, 0.95, 0.90, 0.75) are reported by dashed lines. Gray dots represent the sampling plots.

**Table S4.** Results of Distance Decay Models calculated by linear regression model and quantile regression at four different  $\tau$  values (from upper to lower lines: 0.99, 0.95, 0.9, 0.75), considering the vegetation plots and the pixels of Transition dunes (N16 EUNIS category). P-value: \* < 0.05; \*\* < 0.01; \*\*\* < 0.001.

| Jaccard similarities – Euclidean distance     |        |           |                            |                                |                                                 |  |
|-----------------------------------------------|--------|-----------|----------------------------|--------------------------------|-------------------------------------------------|--|
| Regression type                               | $\tau$ | Intercept | Intercept boundaries (99%) | decay rate (10 <sup>-2</sup> ) | decay rate (10 <sup>-2</sup> ) boundaries (99%) |  |
| Linear regression                             | –      | 0.224***  | 0.189 – 0.260              | -1.168***                      | -2.268 – -0.067                                 |  |
| Quantile                                      | 0.75   | 0.307***  | 0.267 – 0.364              | -1.374                         | -3.022 – 0.127                                  |  |
|                                               | 0.90   | 0.407***  | 0.357 – 0.509              | -0.973                         | -4.031 – 0.403                                  |  |
|                                               | 0.95   | 0.510***  | 0.430 – 0.573              | -2.267***                      | -3.911 – -0.276                                 |  |
|                                               | 0.99   | 0.635***  | 0.576 – 0.749              | -2.649**                       | -4.132 – -0.374                                 |  |
| Bray-Curtis similarities – Euclidean Distance |        |           |                            |                                |                                                 |  |
| Regression type                               | $\tau$ | Intercept | Intercept boundaries (99%) | decay rate (10 <sup>-2</sup> ) | decay rate (10 <sup>-2</sup> ) boundaries (99%) |  |
| Linear regression                             | –      | 0.256***  | 0.214 – 0.299              | -1.759***                      | -3.082 – -0.436                                 |  |
| Quantile                                      | 0.75   | 0.376***  | 0.316 – 0.452              | -2.417***                      | -4.427 – -0.441                                 |  |
|                                               | 0.90   | 0.534***  | 0.491 – 0.594              | -3.108***                      | -4.892 – -1.718                                 |  |
|                                               | 0.95   | 0.612***  | 0.535 – 0.673              | -3.602***                      | -5.302 – -1.646                                 |  |
|                                               | 0.99   | 0.716***  | 0.658 – 0.804              | -3.73*                         | -5.459 – 0.581                                  |  |

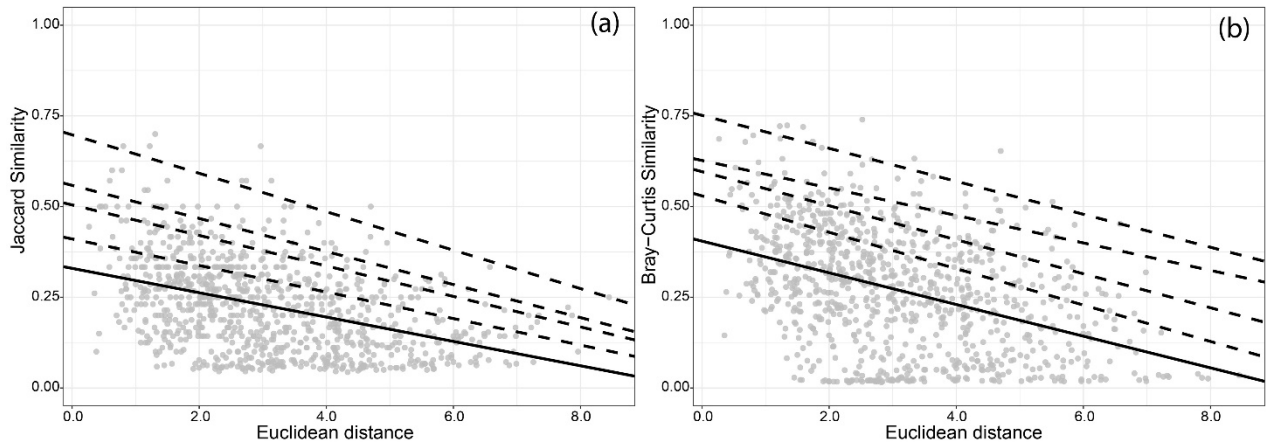

**Figure S3.** Distance Decay Models of species similarity, Jaccard (a) and Bray-Curtis (b), versus spectral distance (Euclidean distance) considering the vegetation plots and the pixels invaded by *Carpobrotus* spp., Invaded category. The linear regression is described by solid line, the quantile regressions considering four different  $\tau$  (from upper to lower lines: 0.99, 0.95, 0.90, 0.75) are reported by dashed lines. Gray dots represent the sampling plots.

**Table S5.** Results of Distance Decay Models calculated by linear regression model and quantile regression at four different  $\tau$  values (from upper to lower lines: 0.99, 0.95, 0.9, 0.75), considering the vegetation plots and the pixels invaded by *Carpobrotus* spp., Invaded category. P-value: \* < 0.05; \*\* < 0.01; \*\*\* < 0.001.

| Jaccard similarities – Euclidean distance     |        |           |                            |                                |                                                 |  |
|-----------------------------------------------|--------|-----------|----------------------------|--------------------------------|-------------------------------------------------|--|
| Regression type                               | $\tau$ | Intercept | Intercept boundaries (99%) | decay rate (10 <sup>-2</sup> ) | decay rate (10 <sup>-2</sup> ) boundaries (99%) |  |
| Linear regression                             | –      | 0.330***  | 0.301 – 0.358              | -3.357***                      | -3.018 – -3.577                                 |  |
| Quantile                                      | 0.75   | 0.411***  | 0.383 – 0.445              | -3.657***                      | -4.560 – -2.815                                 |  |
|                                               | 0.90   | 0.505***  | 0.460 – 0.525              | -4.204***                      | -4.943 – -3.078                                 |  |
|                                               | 0.95   | 0.558***  | 0.503 – 0.609              | -4.557***                      | -5.571 – -3.126                                 |  |
|                                               | 0.99   | 0.698***  | 0.626 – 0.791              | -5.299***                      | -6.832 – -2.232                                 |  |
| Bray-Curtis similarities – Euclidean Distance |        |           |                            |                                |                                                 |  |
| Regression type                               | $\tau$ | Intercept | Intercept boundaries (99%) | decay rate (10 <sup>-2</sup> ) | decay rate (10 <sup>-2</sup> ) boundaries (99%) |  |
| Linear regression                             | –      | 0.405***  | 0.368 – 0.441              | -4.367***                      | -5.421 – -3.313                                 |  |
| Quantile                                      | 0.75   | 0.529***  | 0.484 – 0.564              | -5.016***                      | -6.131 – -3.679                                 |  |
|                                               | 0.90   | 0.596***  | 0.551 – 0.639              | -4.688***                      | -6.027 – -2.938                                 |  |
|                                               | 0.95   | 0.627***  | 0.562 – 0.721              | -3.788***                      | -6.789 – -1.964                                 |  |
|                                               | 0.99   | 0.751***  | 0.717 – 0.820              | -4.544***                      | -6.344 – -2.105                                 |  |
